# Supplementary material for: Regulation of carotenoid accumulation and the expression of carotenoid metabolic genes in citrus juice sacs in vitro
Source: PubMed Central journal article supplement — J Exp Bot. 2011 Oct 11;63(2):871–86. doi: 10.1093/jxb/err318 (PMC3254687; doi:10.1093/jxb/err318), 2011-10-11
Supplement: supp_err318_00061622_file001.pdf [file supp_err318_00061622_file001.pdf]

**Regulation of carotenoid accumulation and the expression of carotenoid metabolic genes in citrus juice sacs *in vitro*.**

Lancui Zhang, Gang Ma, Masaya Kato, Kazuki Yamawaki, Toshihiko Takagi, Yoshikazu Kiriwa, Yoshinori Ikoma, Hikaru Matsumoto, Hirohisa Nesumi, Terutaka Yoshioka

**Supplemental Table S1.** The changes in ascorbic acid content in the juice sacs cultured *in vitro* and *in vivo*

|                 | Ascorbic acid content ( $\mu\text{mol g}^{-1}$ ) |                 |                 |                 |                 |                 |
|-----------------|--------------------------------------------------|-----------------|-----------------|-----------------|-----------------|-----------------|
|                 | Satsuma mandarin                                 |                 | Valencia orange |                 | Lisbon lemon    |                 |
|                 | 0 week                                           | 8 week          | 0 week          | 8 week          | 0 week          | 8 week          |
| <i>In vitro</i> | 2.16 $\pm$ 0.39                                  | 1.86 $\pm$ 0.14 | 5.85 $\pm$ 0.07 | 2.79 $\pm$ 0.21 | 6.26 $\pm$ 0.21 | 2.91 $\pm$ 0.29 |
| <i>In vivo</i>  | 2.16 $\pm$ 0.39                                  | 1.81 $\pm$ 0.23 | 5.85 $\pm$ 0.07 | 3.53 $\pm$ 0.29 | 6.26 $\pm$ 0.21 | 3.71 $\pm$ 0.40 |
